# Supplementary material for: Food and nutrient intake and adherence to dietary recommendations during pregnancy: a Nordic mother–child population-based cohort
Source: PubMed Central journal article supplement (PMC6939665; doi:10.29219/fnr.v63.3676), 2019-12-20
Supplement: FNR-63-3676-s001.pdf [file FNR-63-3676-s001.pdf]

# 1 Supplementary tables and figures

## 1. Supplementary table, General background characteristics

| Anthropometric characteristics in present cohort (N=1674) |                                 |       |       | PreventADALL study cohort (N 2701) |
|-----------------------------------------------------------|---------------------------------|-------|-------|------------------------------------|
| *Height measured at inclusion                             |                                 |       |       |                                    |
| **Pre-pregnancy                                           |                                 |       |       |                                    |
|                                                           | Mean (SD)                       | Min   | Max   | Mean (SD)                          |
| Age mother (years)                                        | 32.5 (4.1)                      | 21.0  | 48.0  | 32.3 (4.2)                         |
| Height mother (cm)*                                       | 168.2 (6.3)                     | 147.0 | 187.0 | 168.0 (6.2)                        |
| Weight mother (kg)**                                      | 65.5 (11.1)                     | 42.0  | 124.0 | 65.5 (11.4)                        |
| BMI **                                                    | 24.6 (3.5)                      | 17.2  | 41.4  | 24.9 (3.8)                         |
|                                                           | Categories                      | N     | %     | (N 2349) %                         |
| Mother Nordic origin (N 1520)                             |                                 | 1379  | 90.8  | 90.1                               |
| Marital status (N=1520)                                   | Married                         | 604   | 39.7  | 41.2                               |
|                                                           | Cohabitants                     | 872   | 57.4  | 55.9                               |
|                                                           | Single                          | 26    | 1.7   | 1.9                                |
|                                                           | Other                           | 18    | 1.2   | 1.0                                |
| Maternal education level (N=1513)                         | Preliminary school only (9/10y) | 9     | 0.6   | 0.8                                |
|                                                           | High school only                | 100   | 6.6   | 10.2                               |
|                                                           | Higher education <4y            | 478   | 31.6  | 32.4                               |
|                                                           | Higher education 4 y or more    | 882   | 58.3  | 53.7                               |
|                                                           | PhD                             | 43    | 2.8   | 2.9                                |
|                                                           | Other education                 | 1     | 0.1   | 0.1                                |
| Paternal education level (N=1470)                         | Preliminary school only (9/10y) | 16    | 1.1   | 1.3                                |
|                                                           | High school only                | 232   | 15.8  | 19.4                               |
|                                                           | Higher education <4y            | 453   | 30.8  | 30.0                               |
|                                                           | Higher education 4 y or more    | 700   | 47.6  | 44.7                               |
|                                                           | PhD                             | 54    | 3.7   | 3.4                                |
|                                                           | Other education                 | 2     | 0.1   | 0.3                                |
| Maternal Work (N=1604)                                    | None of the above               | 13    | 0.9   | 0.9                                |
|                                                           | Fulltime                        | 1299  | 81.0  | 73.3                               |
|                                                           | Part-time                       | 129   | 8.0   | 8.0                                |
|                                                           | Student                         | 103   | 6.4   | 5.5                                |
|                                                           | Housewife/ homemaker            | 16    | 1.0   | 0.9                                |
|                                                           | Job-seeker/unemployed           | 22    | 1.4   | 1.2                                |
|                                                           | Disabled                        | 10    | 0.6   | 0.3                                |
| Gross income household (NOK) (N=1520)                     | Other                           | 25    | 1.6   | 1.4                                |
|                                                           | Below 300 000                   | 15    | 1.0   | 1.3                                |
|                                                           | 300 000 -600 000                | 142   | 9.3   | 13.0                               |
|                                                           | 600 000- 1 000 000              | 562   | 37.0  | 40.8                               |
|                                                           | 1 000 000 – 1 400 000           | 572   | 37.8  | 31.6                               |
|                                                           | > 1 400 000                     | 210   | 13.8  | 11.5                               |
| Previous pregnancies (N1520)                              | Did not want to answer          | 17    | 1.1   | 1.7                                |
|                                                           | Yes                             | 810   | 53.3  | 55.0                               |
| Previous deliveries (N=810)                               | 0                               | 246   | 30.4  | 27.6                               |
|                                                           | 1                               | 455   | 56.2  | 57.4                               |
|                                                           | 2                               | 96    | 11.9  | 13.2                               |
|                                                           | 3                               | 8     | 1.0   | 1.3                                |
|                                                           | 4                               | 3     | 0.2   | 0.4                                |
|                                                           | 6                               | 1     | 0.1   | 0.1                                |
|                                                           | 8 or more                       | 1     | 0.1   | 0.1                                |
| Living environment (N=1520)                               | City, densely populated         | 678   | 44.6  | 39.0                               |
|                                                           | City, less densely populated    | 608   | 40.0  | 37.5                               |
|                                                           | Suburb                          | 113   | 7.4   | 15.9                               |
|                                                           | Village                         | 90    | 5.9   | 2.2                                |
|                                                           | Countryside, outside village    | 31    | 2.0   | 5.4                                |
| Tobacco use (previous and/or current) (N=1520)            | Ever                            | 455   | 29.9  | 27.9                               |
|                                                           | Smoking                         | 362   | 23.8  |                                    |

2  
3  
4 **2. Supplementary table, Dietary intake fat (N=1674)**  
5

| Variable               | Unit         | Median      | IQR  | Min  | Max   | 5 <sup>th</sup> | 95 <sup>th</sup> |
|------------------------|--------------|-------------|------|------|-------|-----------------|------------------|
| <b>Fat</b>             | <i>g/day</i> | <b>92.4</b> | 45.6 | 29.1 | 232.8 | 50.5            | 161.7            |
| <b>Saturated</b>       | <i>g/day</i> | <b>33.5</b> | 18.0 | 7.9  | 95.3  | 17.7            | 61.0             |
| <b>Trans</b>           | <i>g/day</i> | <b>0.77</b> | 0.48 | 0.06 | 4.04  | 0.32            | 1.66             |
| <b>Monounsaturated</b> | <i>g/day</i> | <b>43.3</b> | 17.8 | 10.4 | 98.4  | 18.4            | 60.9             |
| <b>Polyunsaturated</b> | <i>g/day</i> | <b>15.7</b> | 9.0  | 3.9  | 71.3  | 8.0             | 31.1             |
| <b>Cholesterol</b>     | <i>g/day</i> | <b>307</b>  | 162  | 67   | 1218  | 155             | 585              |
| <b>Omega 3</b>         | <i>g/day</i> | <b>3.9</b>  | 2.6  | 0.6  | 15.8  | 1.8             | 8.1              |
| <b>Omega 6</b>         | <i>g/day</i> | <b>11.8</b> | 7.1  | 3.5  | 54.8  | 6.0             | 24.1             |

6  
7  
8 **3. Supplementary table, Daily dietary intake of vitamins and nutrients (N=1674)**  
9

| Variable            | Unit                  | Median      | IQR  | 5 <sup>th</sup> Perc | 95 <sup>th</sup> Perc | RI (NNR)    | % of women adhering to NNR |
|---------------------|-----------------------|-------------|------|----------------------|-----------------------|-------------|----------------------------|
| <b>Vitamin A</b>    | <i>RE<sup>a</sup></i> | <b>1694</b> | 1101 | 661                  | 3313                  | <b>800</b>  | <b>90.4</b>                |
| <b>Vitamin C</b>    | <i>mg</i>             | <b>207</b>  | 136  | 86                   | 425                   | <b>85</b>   | <b>95.6</b>                |
| <b>Vitamin D</b>    | <i>µg</i>             | <b>13.6</b> | 12.1 | 4.2                  | 32.6                  | <b>10</b>   | <b>71.3</b>                |
| <b>Vitamin B 6</b>  | <i>mg</i>             | <b>2.7</b>  | 2.3  | 1.3                  | 6.6                   | <b>1.4</b>  | <b>93.4</b>                |
| <b>Vitamin B 12</b> | <i>µg</i>             | <b>7.9</b>  | 4.1  | 4.0                  | 14.5                  | <b>2.0</b>  | <b>99.7</b>                |
| <b>Folate</b>       | <i>µg</i>             | <b>480</b>  | 275  | 236                  | 921                   | <b>500</b>  | <b>45.6</b>                |
| <b>Tocopherol</b>   | <i>α-TE</i>           | <b>25.1</b> | 17.2 | 10.2                 | 48.8                  | <b>10</b>   | <b>95.3</b>                |
| <b>Thiamine</b>     | <i>mg</i>             | <b>2.36</b> | 1.78 | 1.1                  | 5.2                   | <b>1.5</b>  | <b>83.2</b>                |
| <b>Riboflavin</b>   | <i>mg</i>             | <b>2.8</b>  | 2.2  | 1.3                  | 6.2                   | <b>1.6</b>  | <b>86.7</b>                |
| <b>Niacin</b>       | <i>NE<sup>d</sup></i> | <b>30.0</b> | 23.1 | 14.2                 | 65.7                  | <b>17.0</b> | <b>88.8</b>                |
| <b>Iodine</b>       | <i>µg</i>             | <b>256</b>  | 189  | 103                  | 563                   | <b>175</b>  | <b>75.6</b>                |
| <b>Magnesium</b>    | <i>mg</i>             | <b>463</b>  | 206  | 260                  | 770                   | <b>280</b>  | <b>92.4</b>                |
| <b>Zinc</b>         | <i>mg<sup>c</sup></i> | <b>15.5</b> | 14.8 | 7.7                  | 43.4                  | <b>9</b>    | <b>89.8</b>                |
| <b>Calcium</b>      | <i>mg</i>             | <b>1045</b> | 558  | 495                  | 1960                  | <b>900</b>  | <b>63.8</b>                |
| <b>Potassium</b>    | <i>g</i>              | <b>4.73</b> | 2.10 | 2.68                 | 7.75                  | <b>3.1</b>  | <b>89.9</b>                |
| <b>Selenium</b>     | <i>µg</i>             | <b>69</b>   | 52   | 31                   | 162                   | <b>60</b>   | <b>58.7</b>                |
| <b>Copper</b>       | <i>mg</i>             | <b>1.83</b> | 1.94 | 0.87                 | 5.60                  | <b>1.0</b>  | <b>90.0</b>                |
| <b>Phosphorus</b>   | <i>mg</i>             | <b>1876</b> | 820  | 1060                 | 3108                  | <b>700</b>  | <b>99.9</b>                |
| <b>Iron</b>         | <i>mg<sup>b</sup></i> | <b>15.1</b> | 10.0 | 7.3                  | 92.0                  | *           | *                          |
| <b>Manganese</b>    | <i>mg</i>             | <b>0.0</b>  | 2.5  | 0.0                  | 5.0                   | **          | **                         |

10 IQR: Interquartile range, RI: Recommended intake (NNR2012) in pregnancy

11 <sup>a</sup> Retinol equivalents; 1 retinol equivalent (re) = 1 µg retinol = 12 µg β-carotene.

12 <sup>α</sup>-tocopherol equivalents; 1 α-tocopherol equivalent (α-te) = 1 mg rrr α-tocopherol

13 <sup>b</sup> Meal composition influences the utilization of dietary iron. Availability increases if the diet contains abundant amounts of vitamin C and meat or fish daily, and it is decreased with simultaneous intake of polyphenols or phytic acid.

14 <sup>c</sup> The utilization of zinc is negatively influenced by phytic acid and positively influenced by animal protein. The recommended intakes are valid for a mixed animal/vegetable diet. For vegetarian cereal-based diets, a 25%–30% higher intake is recommended

15 <sup>d</sup> Niacin equivalent; 1 niacin equivalent (ne) = 1 mg niacin = 60 mg tryptophan

16 \*Iron balance during pregnancy requires iron stores of approximately 500 mg at the start of pregnancy. The physiological need of some women for iron cannot be satisfied during the last two thirds of pregnancy with food only, and supplemental iron is needed.

17 \*\* Too limited data to determine requirements during pregnancy

23  
24  
25

4. Supplementary table, Intake of foods in g/day

| Variable                              | Median      | IQR  | 5 <sup>th</sup> Perc | 95 <sup>th</sup> Perc |
|---------------------------------------|-------------|------|----------------------|-----------------------|
| <b>Bread</b>                          | <b>140</b>  | 114  | 35                   | 311                   |
| <b>Cereals</b>                        | <b>130</b>  | 116  | 34                   | 336                   |
| <b>Cake</b>                           | <b>20</b>   | 24   | 3                    | 63                    |
| <b>Potatoes</b>                       | <b>36</b>   | 43   | 5                    | 117                   |
| <b>Vegetables</b>                     | <b>363</b>  | 261  | 141                  | 802                   |
| <b>Fruit, berries</b>                 | <b>430</b>  | 327  | 143                  | 1008                  |
| <i>Fresh</i>                          | <b>221</b>  | 188  | 61                   | 623                   |
| <i>Jam, conserves</i>                 | <b>12</b>   | 20   | 0.2                  | 52                    |
| <i>Juice, smoothie</i>                | <b>144</b>  | 240  | 6                    | 501                   |
| <i>Nuts, olives, seeds</i>            | <b>7</b>    | 15   | 0                    | 50                    |
| <b>Meat</b>                           | <b>112</b>  | 78   | 28                   | 225                   |
| <i>Red meat</i>                       | <b>74</b>   | 55   | 17                   | 157                   |
| <i>Poultry</i>                        | <b>33</b>   | 39   | 2                    | 97                    |
| <b>Fish and seafood</b>               | <b>77</b>   | 64   | 17                   | 182                   |
| <i>Low-fat, half-fat</i>              | <b>12</b>   | 19   | 0                    | 44                    |
| <i>Fat</i>                            | <b>20</b>   | 19   | 1                    | 58                    |
| <i>Fish Products</i>                  | <b>1</b>    | 4    | 0                    | 13                    |
| <i>unspecified</i>                    | <b>6</b>    | 12   | 0                    | 30                    |
| <i>Shellfish, entrails</i>            | <b>2</b>    | 4    | 0                    | 14                    |
| <i>Fish spread</i>                    | <b>4</b>    | 15   | 0                    | 43                    |
| <i>Sushi</i>                          | <b>14</b>   | 28   | 0                    | 67                    |
| <b>Egg</b>                            | <b>20</b>   | 21   | 3                    | 64                    |
| <b>Dairy products</b>                 | <b>345</b>  | 326  | 53                   | 920                   |
| <i>Milk, yoghurt</i>                  | <b>316</b>  | 318  | 35                   | 881                   |
| <i>Full cream milk</i>                | <b>0</b>    | 2    | 0                    | 143                   |
| <i>Semi-skim milk</i>                 | <b>10</b>   | 58   | 0                    | 308                   |
| <i>Skim milk</i>                      | <b>0</b>    | 2    | 0                    | 300                   |
| <i>Milk unspecified</i>               | <b>8</b>    | 11   | 0                    | 25                    |
| <i>Yoghurt</i>                        | <b>62</b>   | 97   | 0                    | 301                   |
| <i>Milk flavored</i>                  | <b>5</b>    | 29   | 0                    | 128                   |
| <i>Cultured milk</i>                  | <b>0</b>    | 2    | 0                    | 57                    |
| <i>Quark</i>                          | <b>0</b>    | 9    | 0                    | 49                    |
| <i>(Ice-, sour-) cream</i>            | <b>25</b>   | 30   | 4                    | 92                    |
| <b>Cheese</b>                         | <b>29</b>   | 24   | 8                    | 75                    |
| <b>Butter, margarine</b>              | <b>27</b>   | 29   | 5                    | 77                    |
| <i>Margarine</i>                      | <b>1</b>    | 1    | 0                    | 3                     |
| <i>Low-fat margarine</i>              | <b>0</b>    | 11   | 0                    | 40                    |
| <i>Butter</i>                         | <b>1</b>    | 13   | 0                    | 41                    |
| <i>unspecified</i>                    | <b>3</b>    | 3    | 1                    | 11                    |
| <i>Oil, other fat</i>                 | <b>1</b>    | 1    | 0                    | 3                     |
| <i>Mayonnaise, dressing</i>           | <b>4</b>    | 10   | 0                    | 28                    |
| <b>Sugar, sweets</b>                  | <b>19</b>   | 23   | 3                    | 68                    |
| <b>Beverages</b>                      | <b>2061</b> | 1019 | 936                  | 3646                  |
| <i>Coffee</i>                         | <b>203</b>  | 385  | 0                    | 878                   |
| <i>Tea</i>                            | <b>92</b>   | 231  | 0                    | 768                   |
| <i>Juice, soft-drink</i>              | <b>19</b>   | 18   | 0                    | 291                   |
| <i>Juice, soft-drink (sugar-free)</i> | <b>19</b>   | 143  | 0                    | 701                   |
| <i>Wine, beer (alcohol-free)</i>      | <b>5</b>    | 36   | 0                    | 143                   |
| <i>Beer</i>                           | <b>0</b>    | 5    | 0                    | 143                   |
| <i>Wine, Liquor</i>                   | <b>0</b>    | 3    | 0                    | 64                    |
| <i>Wine</i>                           | <b>0</b>    | 2    | 0                    | 63                    |
| <i>Liquor</i>                         | <b>0</b>    | 0    | 0                    | 1                     |
| <i>Drinks</i>                         | <b>0</b>    | 0    | 0                    | 7                     |

26  
27
